## **Atmospheric plasma jet device for versatile electron microscope grid treatment**

Eungjin Ahn<sup>1</sup>, Tianyu Tang<sup>2</sup>, Byungchul Kim<sup>1</sup>, Hae June Lee<sup>2\*</sup>, and Uhn-Soo Cho<sup>1\*</sup>

<sup>1</sup>Department of Biological Chemistry, University of Michigan, Ann Arbor, Michigan 48109, USA

<sup>2</sup>Department of Electrical and Computer Engineering, Pusan National University, Busan 46241, South Korea

\* Co-correspondence

Lead contact: [uhnsoo@umich.edu](mailto:uhnsoo@umich.edu)

Tel: 734-765-6765

## **Abstract**

Atmospheric pressure plasmas have been widely applied in surface modification and biomedical treatment due to its ability to generate highly reactive radicals and charged particles. In cryogenic electron microscopy (cryo-EM), plasmas have been used in eliminating the surface contaminants as well as generating the hydrophilic surface to embed the specimen on grids. Particularly, plasma treatment is a prerequisite for negative stain and quantifoil grids, which are coated with hydrophobic carbon on the grid surface. Here we introduce a non-thermal atmospheric plasma jet system as an alternative new tool for surface treatment. Unlike the conventional glow discharger, we found that the plasma jet system successfully cleans the grid surface and introduces hydrophilicity on grids in the ambient environment without introducing a vacuum. Therefore, we anticipate the plasma jet system will be beneficial in many aspects, such as cost-effective, convenient, versatile, and potential applications in surface modification for both negative stain and cryo-EM grid treatment.

## Introduction

Solving atomic-resolution protein structure using single-particle cryogenic electron microscopy (cryo-EM) becomes more and more routine and substantial in the structural biology field. Recent technical advances in cryo-EM instruments (cold field-emission gun, aberration corrector, next-generation direct detector, and etc.) as well as software developments further accelerate this trend (1, 2). Therefore, it is not surprising to see that sample and grid preparation become a bottleneck in illustrating the protein structure using cryo-EM. Purified biomolecular assemblies are embedded in thin amorphous ice after plunge-frozen in liquid ethane. Successful microscopic data acquisition requires the optimization of specimen preparation procedures, such as selecting grid types/treatment and finding the best blotting condition (3, 4). Various types of grids are commercially available and have been examined to overcome ice thickness, particle drafting during image collection (5), protein denaturation due to the exposure in the air-water interface (6–8). Regardless of grid types, plasma treatment is a prerequisite before applying protein specimen (9). Since the grid surface is hydrophobic and contaminated by dirt and others, plasma treatment is a necessary step to clean and modify the grid surface into hydrophilic, thereby enhancing grid and solution contact. Particularly, negative stain EM grids and the quantifoil grids are additionally coated with hydrophobic carbons, which must be modified to the hydrophilic surface before applying specimen (10).

Plasma treatment for material processing has a long history and successful achievement in the semiconductor industry. For the last couple of decades, low-temperature plasmas (LTPs) in atmospheric pressure are applied to an enormous range of biomedical applications and surface treatment by virtue of the controllability of the chemical reactions of radicals and the change in the energy distributions of charged particles (11–13). LTPs have non-equilibrium electrons and ions where the gas temperature and the ion temperature are at the range of

room temperature not to deliver thermal damage on the body, while the electron temperature is up to tens of thousands Kelvin (14). High energy electrons generate complex chemical species and high ion flux by the collisions with neutral gas. Ions can be accelerated across thin sheath layers to impact the surface (15). The synergy effect of the radicals and the ions on the surface is well understood for the semiconductor etching process in low-pressure plasma processing (16), but it is much more complicated to understand the interaction of atmospheric pressure plasmas because of high collisionality.

The low-energy plasma modification system is a widely used instrument for grid pre-treatment to introduce hydrophilicity and clean the grid surface under the vacuum. Recently, the plasma treatment step combined with vapors of chemical precursors has been used to further introduce functional groups on the graphene surface to overcome preferred orientation and reduce specimen movement (17). Although this new approach looks promising in functionalizing the graphene surface in a controlled manner, it is very challenging to build such a device as an individual laboratory. Here, we introduce an atmospheric pressure plasma jet device that generates plasma in the air environment with the potential of versatile surface modification. The strengths of the plasma jet system are: First, it is easy to install at a low price. Second, it is easy to use without introducing a vacuum. Finally, with the assist of additional setups, it has the potential for surface modification with simple chemical molecules. We anticipate that this plasma jet device can greatly contribute to the development of functional grids and single particle protein observation in cryo-EM.

## Result

### Building atmospheric pressure plasma jet device

Plasma is described as a quasi-neutral mixture of charged particles and radicals in a partially ionized gas. The glow discharger and plasma jet device both use plasma as a source to remove the surface contaminants and oxidize hydrocarbon to generate hydrophilic functional groups (e.g. hydroxyl, carboxyl, epoxy groups) (Figure 1a). In general, plasma requires a high vacuum environment due to its high reactivity and collision rate with other gas molecules, which eliminate those active ionic gas molecules before arriving at the target surface. The plasma jet system helps charged particles reach the target surface before making an unfavorable reaction in the atmosphere, thereby proceeding surface modification even in the atmospheric environment. The plasma jet device composition only requires several parts such as the voltage source, dielectric tube (jet part), and flow gas with the flow controller (Figure 1b). Therefore, the plasma jet system does not require a vacuum pump or a chamber and works well in the atmospheric environment, which also helps reducing operation time without warm-up. The setup price for the whole plasma jet device, including circuit, power source, carrier gas, and other safety tools, is less than \$ 700 and could be set up easily in a day without any professional knowledge or experience.

Plasma become activated when a power of 1 W is applied to the circuit with a gas flow injected from the tube to the surface (Figure 1c). The detailed inner structure of the jet part is described in Figure S1. Figure S2 showed the applied voltage versus discharge current waveforms of the argon (Ar) plasma jet for two cycles under the peak-to-peak voltage of 3.2 kV and gas flow rate of 2 SLM. The discharge power consumed by the Ar plasma jet under this condition was calculated as 0.431 W by the Lissajous figure (Figure S2) method with a 0.1  $\mu$ F external capacitor.

## **Hydrophilicity and surface cleaning effect mediated by the Plasma Jet**

The hydrophilicity and surface cleaning effect were compared between the plasma jet and commercial glow discharger (PELCO easiGlow). After plasma jet treatment on the petri dish, the water droplet spread along the surface due to increased hydrophilicity (figure 2a). To monitor the degree of surface modification into hydrophilic by time, the water contact angle goniometer was employed (Figure 2b). The contact angle of the plasma jet treated surface over 15 seconds was comparable to that of glow discharge treated surface (30 s, 5 mA), which was  $42 \pm 9.0^\circ$ . To evaluate the surface cleaning effect of plasma jet treatment, atomic force microscopy was introduced. We compared the surface roughness and morphology on a glass slide before and after plasma jet and glow discharge treatment (Figure 2c). The surface roughness ( $R_q$ ) was 6.78 nm in as-prepared slide glass, while it was reduced to 1.01 nm and 0.68 nm after plasma jet and glow discharge treatment, respectively. This denotes that the plasma jet system is effective in surface cleaning and inducing hydrophilicity and comparable to the commercial glow discharge device without introducing vacuum. When the plasma jet was applied to the negative stain grid, it was shown that the water droplet shape was spread evenly through the surface of the grid, compared to poor wetting before plasma treatment (Figure S3). This denotes that the protein samples could be uniformly coated on the surface without aggregations. This plasma-treated grid was used for the next step, protein observation by the negative stain method.

## **Comparison of negative-stain EM images using the conventional glow discharger and the plasma jet system**

To monitor the practical application of the plasma jet system on EM grids, we employed the negative-stain EM approach. The negative-stain EM grids are coated with amorphous carbons, which maintain the hydrophobic surface. The plasma treatment introduces hydrogenation on carbon-coated EM grids, thereby allowing the solution specimen

to make direct contact on the grid surface. Three different grids—untreated, plasma jet treated (applied power: 1 W, 1 min), and glow discharger treated (5 mA, 1 min)—were prepared and used to apply the protein sample (*Methylococcus capsulatus* soluble methane monooxygenase, *M. caps* MMOH) using the standard protocol. As shown in Figure 3, the plasma jet treated negative-stain EM grid showed well-distributed particles on the surface comparable to the one treated with the glow discharger, unlike the untreated negative-stain EM grid, which showed particle/stain aggregation on the surface. This indicates that the plasma jet device can successfully introduce hydrophilicity and cleaning on the grid surface comparable to the commercial glow discharger.

### **Oxidation studies of the graphene by the plasma treatment**

To compare the oxidation effect of the plasma jet system, we used the commercial graphene monolayer coated on Cu foil (Graphenea) and Raman spectroscopy to monitor the degree and type of oxidation upon time-dependent plasma treatment. The plasma jet treatment showed a comparable oxidation level to the glow discharger, with gradually increasing D peak ( $1340\text{ cm}^{-1}$ ) intensity by time, which indicates the defect density increases upon exposure (Figure 4a, b). Both conditions similarly maintained the G peak ( $1580\text{ cm}^{-1}$ ) which denotes the maintained basal planes of graphene. However, a notable difference between the plasma jet and glow discharger happened at the 2D peak ( $2670\text{ cm}^{-1}$ ) when we treat the plasma over 2 min. The graphene treated by 5 min glow discharge showed a decreased and broadened 2D peak intensity, which indicates a diminish of graphitic ordered regions in the graphene lattice (18, 19) compared to the plasma jet treated graphene. Therefore, Raman spectra analysis demonstrated that the plasma jet system has the potential to modify the surface of the graphene monolayer to introduce oxidation. Moreover, the plasma jet system showed a better effect in maintaining the graphene lattice (2D peak) compared to the commercial glow discharge.

In this study, we describe the atmospheric plasma jet system that can be utilized as a surface polishing and hydrophilic treatment tool on EM grids. The plasma jet system has strength in cost-effective, easy to set up, available with versatile use, and most importantly, it operates in the atmospheric environment without the vacuum system. We demonstrated that the plasma jet system has the potential to replace the conventional glow discharge method by comparing their effectiveness in hydrophilicity, surface cleaning, and oxidations with water contact angle goniometer, AFM, Raman studies.



## Experimental procedures

### *Atmospheric plasma jet setup*

We utilize a plasma jet, which is a dielectric barrier discharge with the guided gas flow in a tube. A cylindrical metal rod with a radius of 1.5 mm was set at the center of the ceramic tube with an inner radius of 2 mm. A layer of copper tape with a width of 5 mm was covered at the outer ring of the alumina ceramic tube. The thickness of the dielectric material (ceramic tube) is 1 mm. Plasma is generated between the metal rod and the ceramic tube, a ring area with an inner radius of 1.5 mm and an outer radius of 2 mm, and diffuses out through the nozzle. The inner electrode was connected to a high-voltage power source which generates a sinusoidal waveform voltage at 1-3 kV with a frequency of 20 kHz.

### *Negative-stain electron microscopy (EM)*

Carbon supported negative-stain EM grids were prepared either without (as-prepared) or with following plasma treatment. The plasma jet grid was treated with applied power of 1 W at the atmosphere and the commercial glow discharge grid was treated with 5 mA for 1 min under vacuum (< 26 mbar). The *M. caps* MMOH, purified as previously described (20), was immobilized on one of these grids followed by addition of uranyl formate for enhancing contrast and carrying out negative-stain EM. The negative-stain EM micrographic images were collected using 100 kV Morgagni (FEI) at the University of Michigan cryo-EM center.

### *Contact angle goniometer*

A contact angle goniometer (Ossila) was used to measure the water contact angle before and after the plasma-treated surface. The water droplet was dropped on the target surface, and then for droplets with contact angles above 10°, a polynomial curve is fitted to the droplet edge.

Where the curve crosses the surface baseline, its tangent is used to determine the contact angle.

#### *Raman spectroscopy*

Raman microscopy (Renishaw) system equipped with a 532 nm diode laser and a 1200 lines/mm grating was used for spectrum collection through an Olympus SLMPlan 20× objective. All spectra were obtained in extended scan mode in the range of 3000-1000  $\text{cm}^{-1}$  for analysis of framework bands, peak position from 2680  $\text{cm}^{-1}$  for analysis of the 2D band, 1580  $\text{cm}^{-1}$  and 1380  $\text{cm}^{-1}$  for monitoring the G and D band of graphene, respectively. Calibration of the laser was performed in static scan mode using a silicon standard.

#### *Atomic force microscope (AFM)*

AFM images were taken using a Veeco Dimension Icon Atomic Force Microscope with a ScanAsyst-Air AFM tip from Bruker Nano Inc. The data were analyzed using Nanoscope Analysis 2.0 software.

*Acknowledgments* - We thank Dr. Leila Foroughi and Dr. Adam Matzeger in the Department of Chemistry, the University of Michigan for generously allowing the use of the Raman spectroscopy instrument and assistance. We thank staffs at the University of Michigan cryo-EM center for the use of the Morgagni instrument and assistance. We thank Dr. Haiping Sun and the Michigan Center for Materials Characterization for the use of the AFM instrument and assistance. Dr. Seung-Jae Lee at the Chonbuk National University kindly provided the purified *M. caps* MMOH. This research was supported by NIH DK111465 / CA250329 to U.-S.C. and PNU-RENovation (2020-2021) to H.L.

Author contributions - U.-S. C. and H. L. conceived the project. E. A. carried out all the experiments. T. T. helped setting up the plasma jet system for the lab scale. B. K. performed a negative stain EM. E. A. and U.-S. C. wrote the manuscript.

Conflicts of interests - The authors declare that they have no conflicts of interest with the contents of this article.

Abbreviations – The abbreviation used are: LTP, low-temperature plasmas; *M. caps* MMOH, *Methylococcus caps* soluble methane monooxygenase; AFM, atomic force microscope; SLM, standard liter per min

## References

1. Scheres, S. H. W. (2012) RELION: Implementation of a Bayesian approach to cryo-EM structure determination. *J. Struct. Biol.* **180**, 519–530
2. Zivanov, J., Nakane, T., Forsberg, B. O., Kimanius, D., Hagen, W. J. H., Lindahl, E., and Scheres, S. H. W. (2018) New tools for automated high-resolution cryo-EM structure determination in RELION-3. *Elife*. **7**, e42166
3. Thompson, R. F., Walker, M., Siebert, C. A., Muench, S. P., and Ranson, N. A. (2016) An introduction to sample preparation and imaging by cryo-electron microscopy for structural biology. *Methods*. **100**, 3–15
4. Armstrong, M., Han, B.-G., Gomez, S., Turner, J., Fletcher, D. A., and Glaeser, R. M. (2020) Microscale Fluid Behavior during Cryo-EM Sample Blotting. *Biophys. J.* **118**, 708–719
5. Drulyte, I., Johnson, R. M., Hesketh, E. L., Hurdiss, D. L., Scarff, C. A., Porav, S. A., Ranson, N. A., Muench, S. P., and Thompson, R. F. (2018) Approaches to altering particle distributions in cryo-electron microscopy sample preparation. *Acta Crystallogr. Sect. D*. **74**, 560–571
6. Sun, F. (2018) Orienting the future of bio-macromolecular electron microscopy. *Chinese Phys. B*. **27**, 063601
7. Arsiccio, A., McCarty, J., Pisano, R., and Shea, J.-E. (2020) Heightened Cold-Denaturation of Proteins at the Ice–Water Interface. *J. Am. Chem. Soc.* **142**, 5722–5730
8. Klebl, D. P., Gravett, M. S. C., Kontziampasis, D., Wright, D. J., Bon, R. S., Monteiro, D. C. F., Trebbin, M., Sobott, F., White, H. D., Darrow, M. C., Thompson, R. F., and Muench, S. P. (2020) Need for Speed: Examining Protein Behavior during CryoEM Grid Preparation at Different Timescales. *Structure*. **28**, 1238-1248.e4

9. Passmore, L. A., and Russo, C. J. (2016) Specimen Preparation for High-Resolution Cryo-EM. *Methods Enzymol.* **579**, 51–86
10. D'Imprima, E., Floris, D., Joppe, M., Sánchez, R., Grininger, M., and Kühlbrandt, W. (2019) Protein denaturation at the air-water interface and how to prevent it. *Elife.* **8**, e42747
11. Park, J., Lee, H., Lee, H. J., Kim, G. C., Kim, D. Y., Han, S., and Song, K. (2016) Non-Thermal Atmospheric Pressure Plasma Efficiently Promotes the Proliferation of Adipose Tissue-Derived Stem Cells by Activating NO-Response Pathways. *Sci. Rep.* **6**, 39298
12. Choi, J.-H., Song, Y.-S., Lee, H.-J., Hong, J.-W., and Kim, G.-C. (2016) Inhibition of inflammatory reactions in 2,4-Dinitrochlorobenzene induced Nc/Nga atopic dermatitis mice by non-thermal plasma. *Sci. Rep.* **6**, 27376
13. Tang, T. Y., Kim, H. S., Kim, G. H., Lee, B., and Lee, H. J. (2020) Optical diagnostics of the characteristics of a square unipolar nanosecond pulse-driven atmospheric pressure helium plasma jet. *AIP Adv.* **10**, 125218
14. Lee, H. Y., Choi, J. H., Hong, J. W., Kim, G. C., and Lee, H. J. (2018) Comparative study of the Ar and He atmospheric pressure plasmas on E-cadherin protein regulation for plasma-mediated transdermal drug delivery. *J. Phys. D: Appl. Phys.* **51**, 215401
15. Lee, H.-Y., Lee, H.-J., Kim, G.-C., Choi, J.-H., and Hong, J.-W. (2019) Plasma cupping induces VEGF expression in skin cells through nitric oxide-mediated activation of hypoxia inducible factor 1. *Sci. Rep.* **9**, 3821
16. Coburn, J. W., and Winters, H. F. (1979) Ion- and electron-assisted gas-surface chemistry—An important effect in plasma etching. *J. Appl. Phys.* **50**, 3189–3196
17. Naydenova, K., Peet, M. J., and Russo, C. J. (2019) Multifunctional graphene

- supports for electron cryomicroscopy. *Proc. Natl. Acad. Sci.* **116**, 11718 LP – 11724
18. Chen, C.-F., Park, C.-H., Boudouris, B. W., Horng, J., Geng, B., Girit, C., Zettl, A., Crommie, M. F., Segalman, R. A., Louie, S. G., and Wang, F. (2011) Controlling inelastic light scattering quantum pathways in graphene. *Nature*. **471**, 617–620
  19. Ferrari, A. C., and Basko, D. M. (2013) Raman spectroscopy as a versatile tool for studying the properties of graphene. *Nat. Nanotechnol.* **8**, 235–246
  20. Tinberg, C. E., and Lippard, S. J. (2009) Revisiting the Mechanism of Dioxygen Activation in Soluble Methane Monooxygenase from *M. capsulatus* (Bath): Evidence for a Multi-Step, Proton-Dependent Reaction Pathway. *Biochemistry*. **48**, 12145–12158

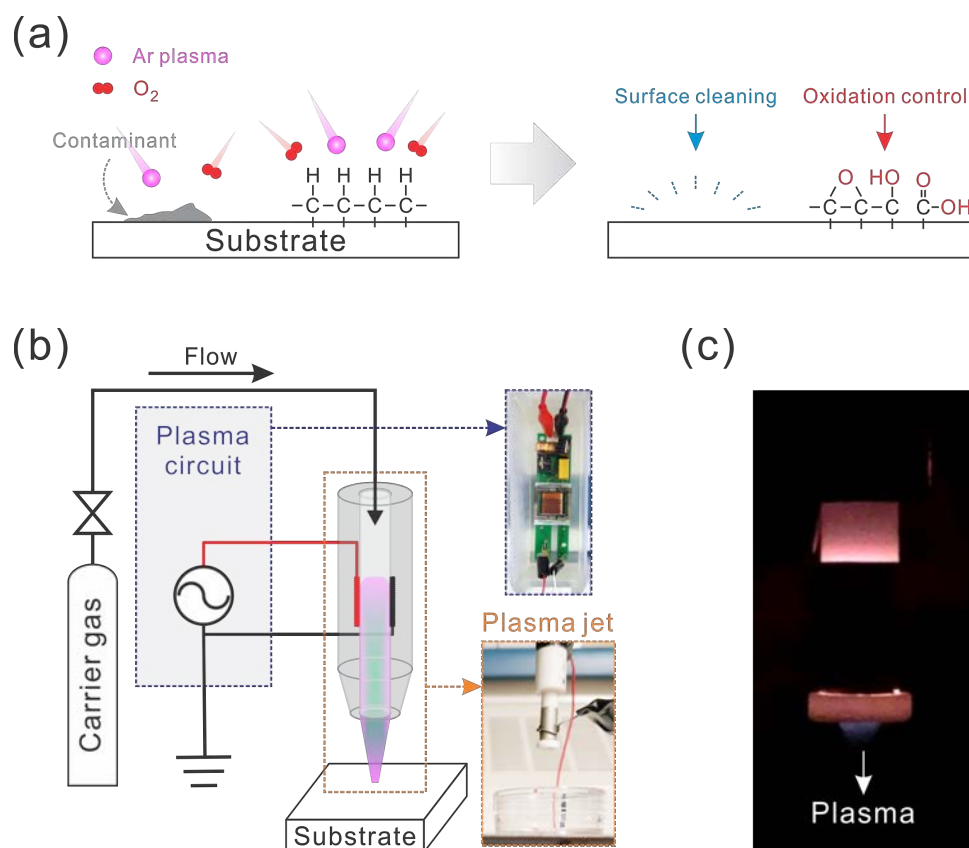

**Figure 1.** (a) Schematic illustration of the plasma treatment effect on the hydrocarbon surface (b) Experimental setup for the atmospheric plasma jet device with the photograph of the circuit (blue dotted box) and the jet (orange dotted box) (c) Photograph of plasma ejected from the jet under the dark background (input power: 1 W).

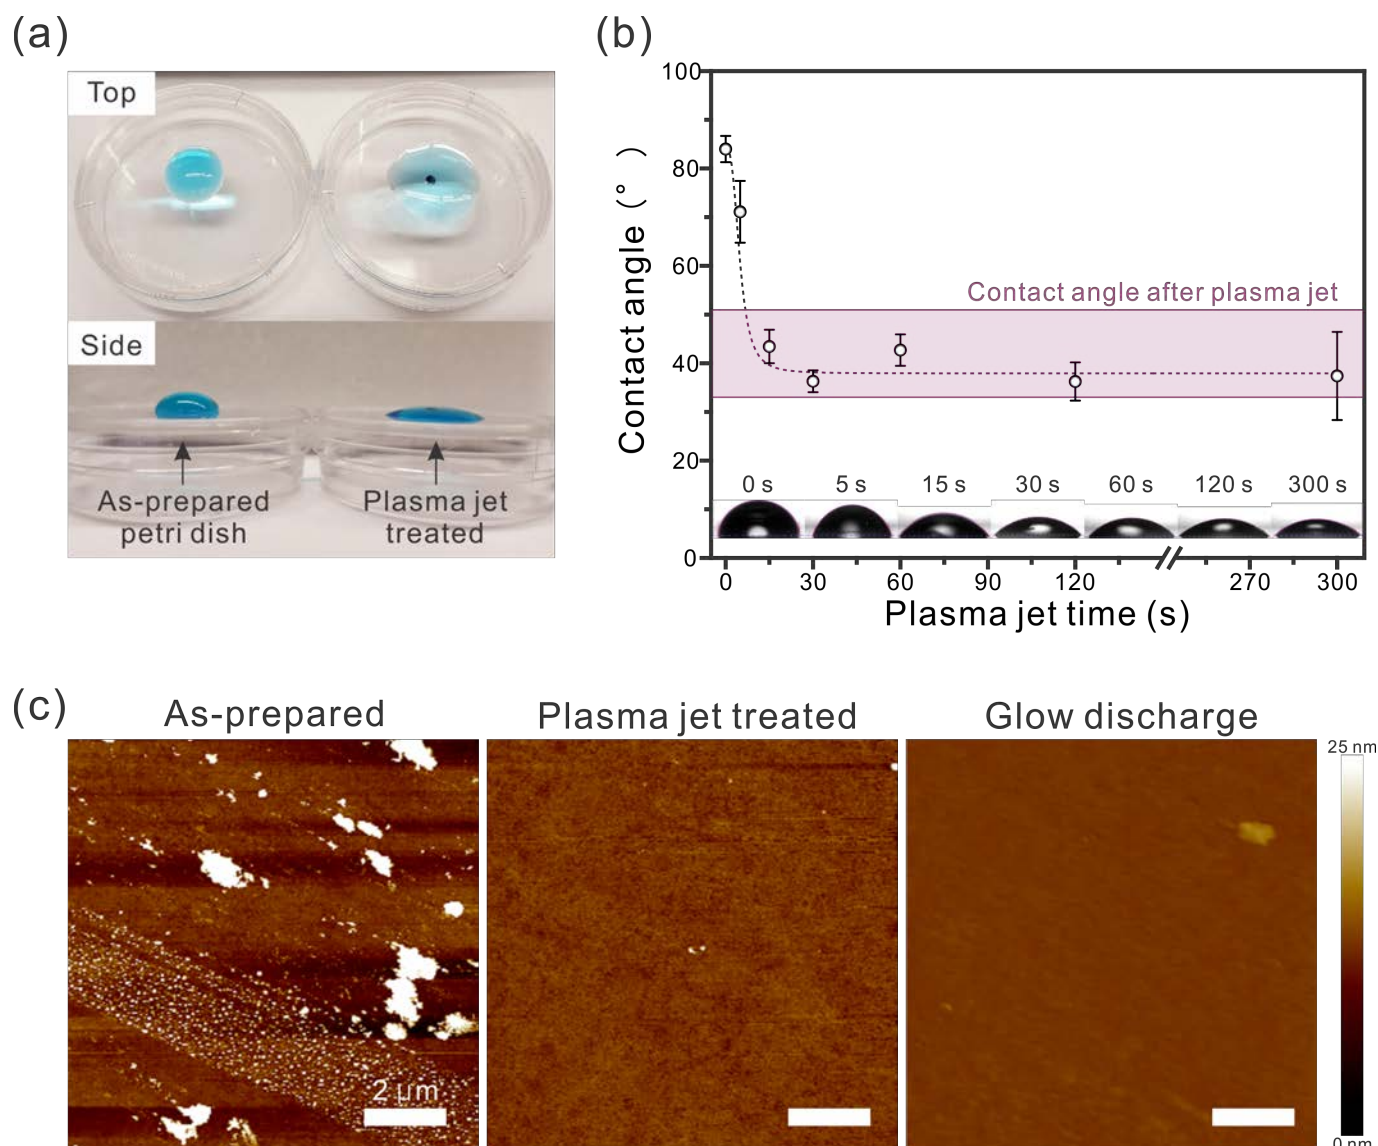

**Figure 2.** (a) Hydrophilicity change on the petri dish before and after plasma jet treatment (2 min). The water droplet was colored with methylene blue to help visualization. (b) Water contact angle measured by the contact angle goniometer after plasma jet treatment. Time-dependent changes were monitored at the petri dish surface. Each plot was averaged after 5-time measurements in different spots. The violet box area denotes the average contact angle of the plasma jet treated sample. (c) AFM morphology comparison before (as-prepared) and after plasma jet treatment and glow discharge treated slide glass.



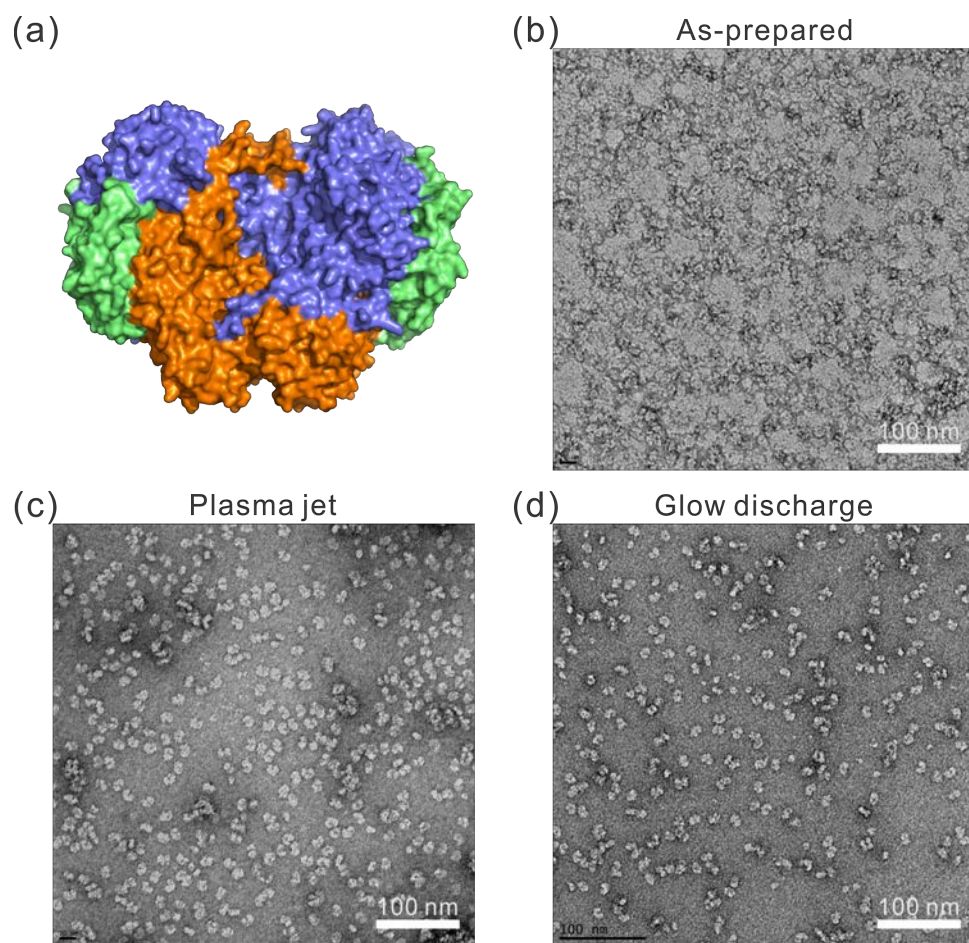

**Figure 3.** (a) Surface representation of *M. caps* MMOH and negative-stain images of MMOH on (b) as-prepared, (c) plasma jet, and (d) glow discharge-treated negative-stain grids.

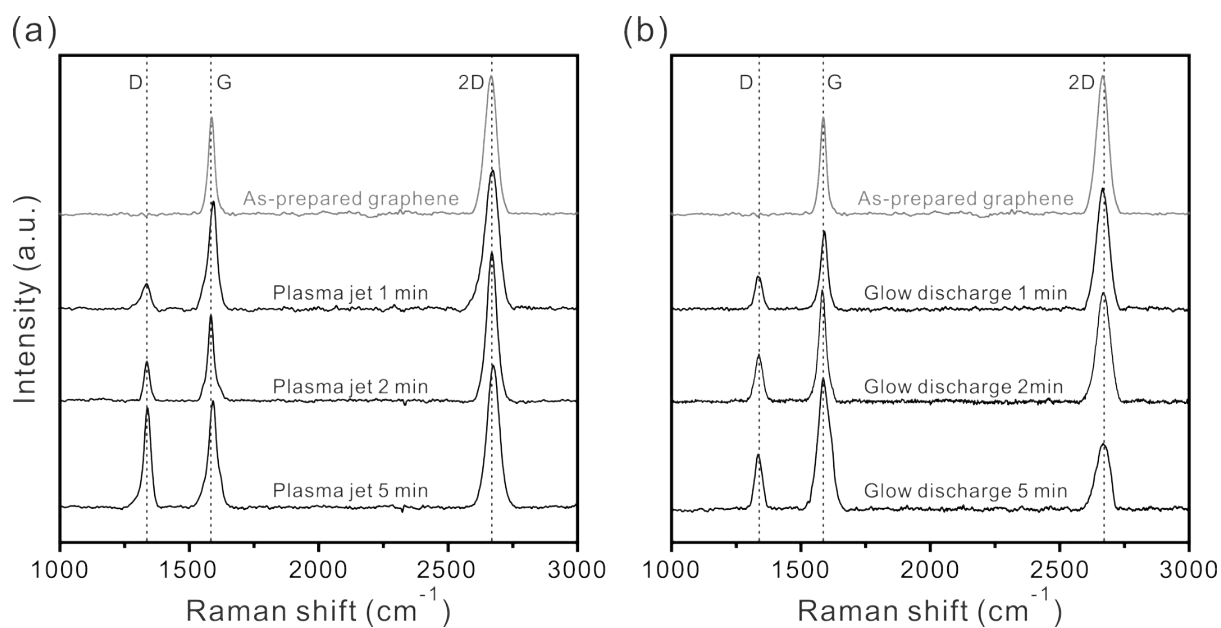

**Figure 4.** Raman spectra of the graphene monolayers on the Cu foil treated with (a) the plasma jet and (b) the glow discharge. Three vertical dotted lines indicated the position of D, G, and 2D peaks from the graphene lattice, respectively.
